# Supplementary material for: Stretchable self-healing hydrogels capable of heavy metal ion scavenging
Source: Royal Society of Chemistry journal article supplement (doi:10.1039/c9ra03443a), 2019-01-01
Supplement: c9ra03443a2.pdf [file c9ra03443a2.pdf]

**Supporting Information for**  
**Stretchable self-healing hydrogels capable of heavy metal**  
**ions scavenging**

Dandan Song, Zengdian Zhao and Shasha Song

School of Chemistry and Chemical Engineering, Shandong University of Technology,

Zibo 255000, P. R. China

\* To whom correspondence should be addressed.

S.S., e-mail: [songshasha@sdut.edu.cn](mailto:songshasha@sdut.edu.cn);

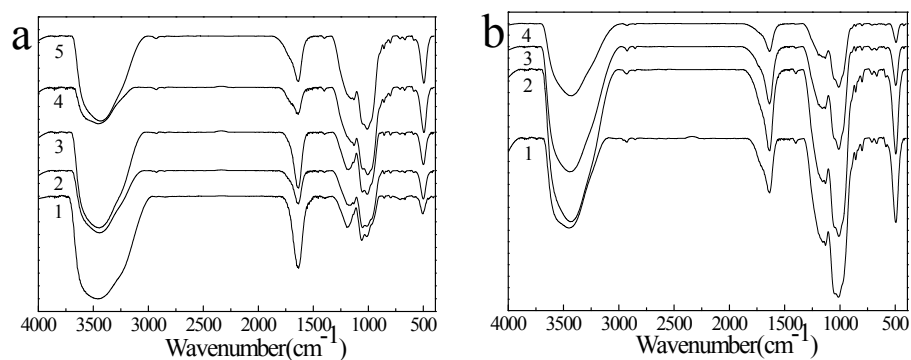

**Fig. S1** FT-IR spectra of freeze-dried PA/CS gel samples formed (a) at  $w_{CS} = 6$  wt% with different  $c_{PA}$  ( $\text{mol}\cdot\text{L}^{-1}$ ): curve 1) 0.3, curve 2) 0.5, curve 3) 0.6, curve 4) 0.8, curve 5) 1; (b) at  $c_{PA} = 1\text{mol}\cdot\text{L}^{-1}$  with different  $w_{CS}$  (wt%): curve 1) 5, curve 2) 6, curve 3) 7, curve 4) 8.

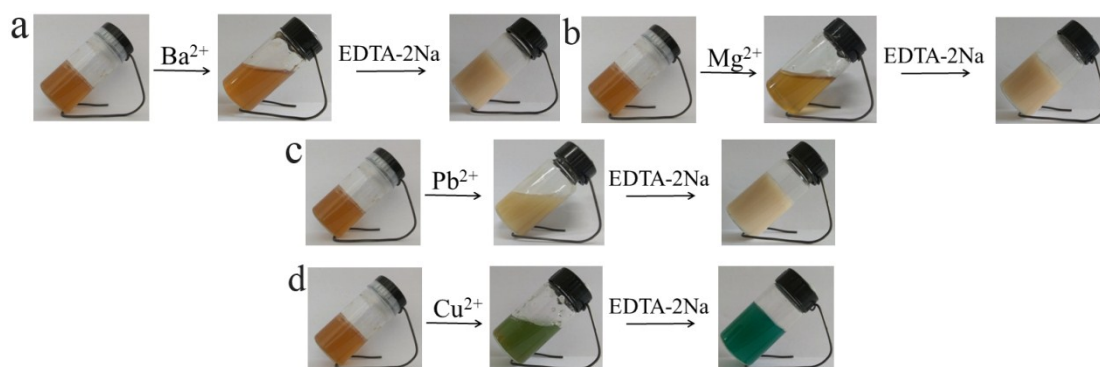

**Fig. S2** Hydrogel's responses to different metal ions: (a)  $\text{Ba}^{2+}$ , (b)  $\text{Mg}^{2+}$ , (c)  $\text{Pb}^{2+}$ , (d)  $\text{Cu}^{2+}$ .

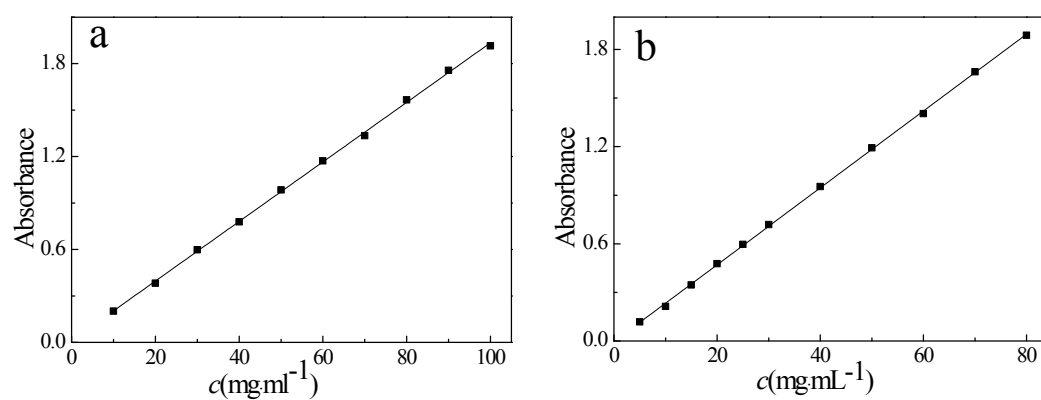

**Fig. S3** The calibration curves of (a)  $\text{Pb}^{2+}$ , (b)  $\text{Cd}^{2+}$  in aqueous solution. The complexation agents for  $\text{Pb}^{2+}$  and  $\text{Cd}^{2+}$  was xylene orange.
